# Supplementary material for: Immunogenicity Testing of Lipidoids In Vitro and In Silico: Modulating Lipidoid-Mediated TLR4 Activation by Nanoparticle Design
Source: PubMed Central journal article supplement (PMC5992342; doi:10.1016/j.omtn.2018.02.003), 2018-02-13
Supplement: mmc1.pdf [file mmc1.pdf]

OMTN, Volume 11

## Supplemental Information

### **Immunogenicity Testing of Lipidoids *In Vitro* and *In Silico*: Modulating Lipidoid-Mediated TLR4 Activation by Nanoparticle Design**

**Anne Marit de Groot, Kaushik Thanki, Monique Gangloff, Emily Falkenberg, Xianghui Zeng, Djai C.J. van Bijnen, Willem van Eden, Henrik Franzyk, Hanne M. Nielsen, Femke Broere, Nick J. Gay, Camilla Foged, and Alice J.A.M. Sijts**

**Figure S1: Chemical structures of L<sub>4</sub>, L<sub>5</sub>, L<sub>6</sub> and DOTAP.** L<sub>4</sub> and L<sub>5</sub> constitute a mixture of different isomers with identical molecular weight, and the most abundant L<sub>4</sub> and L<sub>5</sub> isomers are shown.

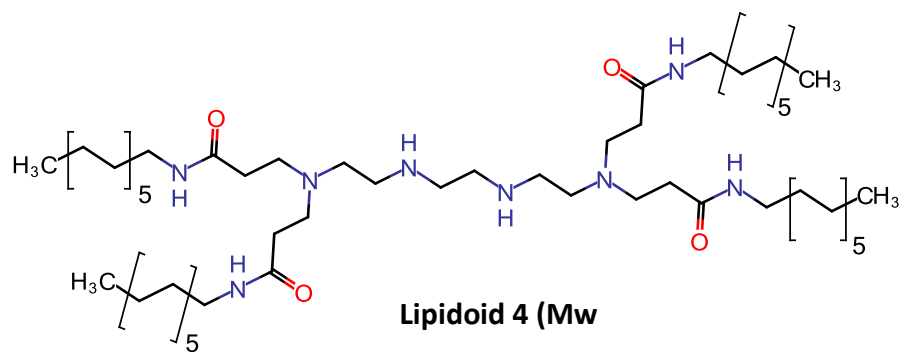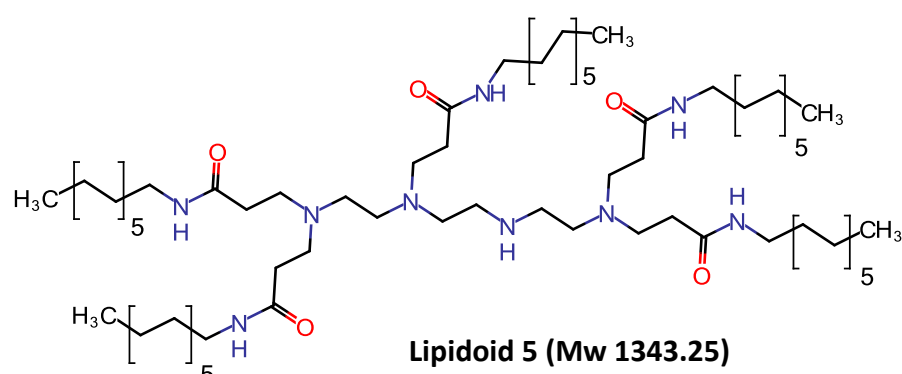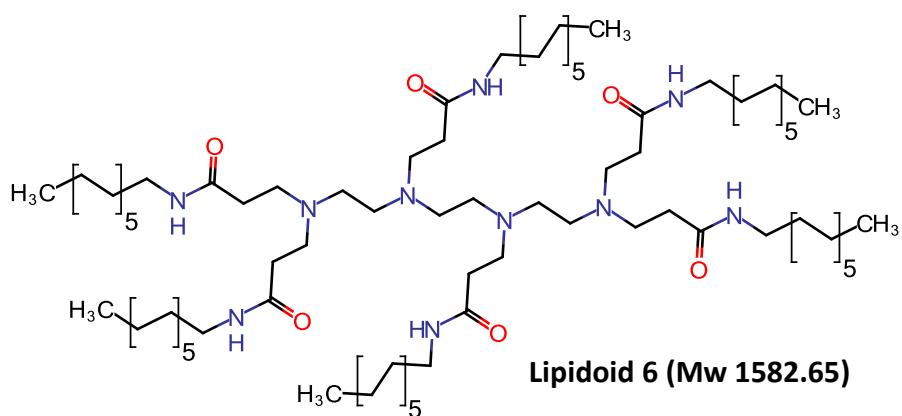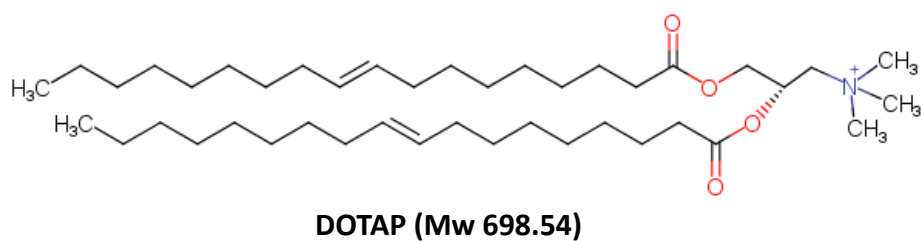

**Figure S2: Lipidoid-polymer hybrid NPs have no effect on cell viability of BM-APCs.** Cell viability is shown as the percentage of cells in the live gate, quantified by flow cytometry upon stimulation with different concentrations of L<sub>5</sub>, compared to BM-APCs incubated with LPS and PBS.

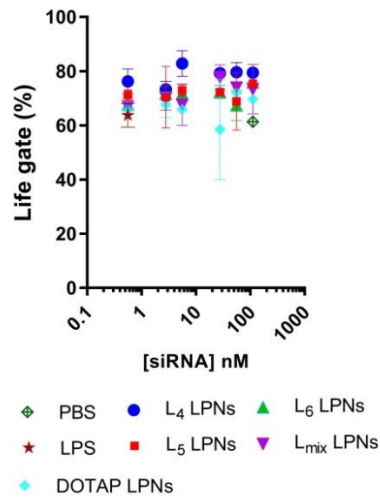

**Figure S3: Proposed binding mode of lipidoids (L<sub>4</sub>, L<sub>5</sub> and L<sub>6</sub>), compared to lipid A moiety of LPS, to TLR4-MD-2.** Top panels from left to right: L<sub>4</sub>, L<sub>6</sub> and lipid A from LPS form hydrophilic contacts with TLR4 R264 at the primary binding site, MD-2 R90 and E92, which also form an ionic interaction with TLR4' E439' at the dimeric interface. TLR4 is represented in green cartoon, TLR4' in cyan and MD-2 in magenta. Bottom series from left to right: side views of L<sub>4</sub>, L<sub>5</sub>, L<sub>6</sub> and lipid A from LPS (TLR4 and MD-2 are not shown). The lipidoids of increasing acyl chain number spread their acyl chains to mimic lipid A conformation adopted in contact with the TLR4-MD-2 complex<sup>29,28</sup>.

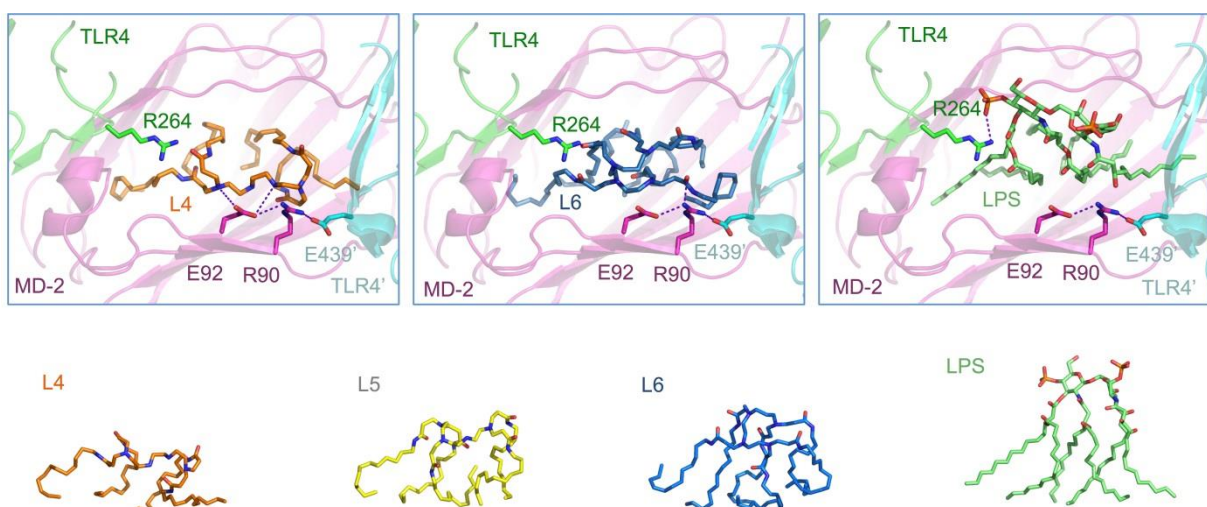

**Table S1: TLR4-MD-2 contacts to L<sub>4</sub>**

List of residues from TLR4-MD-2 at given distances from L<sub>4</sub>, according to the best vina docking model. MD-2 R90 is neutralized by E92 on one side and TLR4 is neutralized by E439' at the dimer interface (both are at 3.2 Å). The same residues are in close proximity to the protonated amines of L<sub>4</sub> at positions 1 and 3. L<sub>4</sub> is more distant to the MD-2 residue F126, which undergoes a conformational change upon activation, as compared to L<sub>5</sub> and L<sub>6</sub>. In contrast, L<sub>4</sub> is localized closer to the dimeric interface than L<sub>5</sub> and L<sub>6</sub>. This proximity is illustrated below by the presence of TLR4 dimer residues (labelled TLR4').

| 3.5 Å     | 4.0 Å      | 4.5 Å      | 5.0 Å      |
|-----------|------------|------------|------------|
|           | TLR4' E439 | TLR4' E439 | TLR4' E439 |
|           | TLR4' F440 | TLR4' F440 | TLR4' F440 |
|           | TLR4' S441 | TLR4' S441 | TLR4' S441 |
|           |            | TLR4' F463 | TLR4' F463 |
| MD-2 I32  | MD-2 I32   | MD-2 I32   | MD-2 I32   |
| MD-2 L61  | MD-2 I46   | MD-2 I44   | MD-2 I44   |
| MD-2 I63  | MD-2 V48   | MD-2 I46   | MD-2 I46   |
| MD-2 L78  | MD-2 I52   | MD-2 V48   | MD-2 V48   |
| MD-2 I80  | MD-2 L54   | MD-2 I52   | MD-2 I52   |
| MD-2 R90  | MD-2 L61   | MD-2 L54   | MD-2 L54   |
| MD-2 I94  | MD-2 I63   | MD-2 L61   | MD-2 L61   |
| MD-2 F104 | MD-2 Y65   | MD-2 I63   | MD-2 I63   |
| MD-2 F119 | MD-2 L71   | MD-2 Y65   | MD-2 Y65   |
| MD-2 I124 | MD-2 F76   | MD-2 L71   | MD-2 L71   |
| MD-2 Y131 | MD-2 L78   | MD-2 L74   | MD-2 L74   |
| MD-2 I153 | MD-2 I80   | MD-2 F76   | MD-2 F76   |
|           | MD-2 V82   | MD-2 L78   | MD-2 L78   |
|           | MD-2 L87   | MD-2 I80   | MD-2 I80   |
|           | MD-2 R90   | MD-2 V82   | MD-2 V82   |
|           | MD-2 E92   | MD-2 L87   | MD-2 L87   |
|           | MD-2 I94   | MD-2 R90   | MD-2 R90   |
|           | MD-2 F104  | MD-2 E92   | MD-2 E92   |
|           | MD-2 I117  | MD-2 I94   | MD-2 I94   |
|           | MD-2 F119  | MD-2 Y102  | MD-2 Y102  |
|           | MD-2 F121  | MD-2 F104  | MD-2 F104  |
|           | MD-2 I124  | MD-2 V113  | MD-2 V113  |
|           | MD-2 F126  | MD-2 T115  | MD-2 T115  |
|           | MD-2 Y131  | MD-2 I117  | MD-2 I117  |
|           | MD-2 C133  | MD-2 S118  | MD-2 S118  |
|           | MD-2 F147  | MD-2 F119  | MD-2 F119  |
|           | MD-2 F151  | MD-2 F121  | MD-2 S120  |
|           | MD-2 I153  | MD-2 I124  | MD-2 F121  |
|           |            | MD-2 F126  | MD-2 K122  |
|           |            | MD-2 Y131  | MD-2 I124  |
|           |            | MD-2 C133  | MD-2 F126  |
|           |            | MD-2 F147  | MD-2 Y131  |
|           |            | MD-2 F151  | MD-2 C133  |
|           |            | MD-2 I153  | MD-2 L146  |
|           |            |            | MD-2 F147  |
|           |            |            | MD-2 F151  |
|           |            |            | MD-2 I153  |

**Table S2: L<sub>5</sub> binding mode to TLR4-MD-2**

List of residues from TLR4-MD-2 at given distances from L<sub>5</sub>, according to the best vina docking model.

| 3.5 Å     | 4.0 Å      | 4.5 Å      | 5.0 Å      |
|-----------|------------|------------|------------|
|           | TLR4' E439 | TLR4' S415 | TLR4' S415 |
|           | TLR4' F440 | TLR4' E439 | TLR4' E439 |
|           |            | TLR4' F440 | TLR4' F440 |
| MD-2 I32  | MD-2 I32   | MD-2 I32   | MD-2 I32   |
| MD-2 L78  | MD-2 I44   | MD-2 I44   | MD-2 I44   |
| MD-2 Y102 | MD-2 I46   | MD-2 I46   | MD-2 I46   |
| MD-2 F119 | MD-2 V48   | MD-2 V48   | MD-2 V48   |
| MD-2 F121 | MD-2 I52   | MD-2 I52   | MD-2 I52   |
| MD-2 K122 | MD-2 L54   | MD-2 L54   | MD-2 L54   |
| MD-2 F126 | MD-2 L61   | MD-2 L61   | MD-2 L61   |
| MD-2 F151 | MD-2 I63   | MD-2 I63   | MD-2 I63   |
|           | MD-2 Y65   | MD-2 Y65   | MD-2 Y65   |
|           | MD-2 L71   | MD-2 L71   | MD-2 L71   |
|           | MD-2 L74   | MD-2 L74   | MD-2 L74   |
|           | MD-2 F76   | MD-2 F76   | MD-2 F76   |
|           | MD-2 L78   | MD-2 L78   | MD-2 L78   |
|           | MD-2 I80   | MD-2 I80   | MD-2 I80   |
|           | MD-2 R90   | MD-2 L87   | MD-2 L87   |
|           | MD-2 E92   | MD-2 R90   | MD-2 R90   |
|           | MD-2 Y102  | MD-2 E92   | MD-2 E92   |
|           | MD-2 F104  | MD-2 I94   | MD-2 I94   |
|           | MD-2 I117  | MD-2 Y102  | MD-2 Y102  |
|           | MD-2 F119  | MD-2 F104  | MD-2 F104  |
|           | MD-2 S120  | MD-2 I117  | MD-2 V113  |
|           | MD-2 F121  | MD-2 S118  | MD-2 I117  |
|           | MD-2 K122  | MD-2 F119  | MD-2 S118  |
|           | MD-2 I124  | MD-2 S120  | MD-2 F119  |
|           | MD-2 F126  | MD-2 F121  | MD-2 S120  |
|           | MD-2 Y131  | MD-2 K122  | MD-2 F121  |
|           | MD-2 C133  | MD-2 G123  | MD-2 K122  |
|           | MD-2 V135  | MD-2 I124  | MD-2 G123  |
|           | MD-2 F147  | MD-2 F126  | MD-2 I124  |
|           | MD-2 L149  | MD-2 Y131  | MD-2 F126  |
|           | MD-2 F151  | MD-2 C133  | MD-2 Y131  |
|           | MD-2 I153  | MD-2 V135  | MD-2 C133  |
|           |            | MD-2 L146  | MD-2 V135  |
|           |            | MD-2 F147  | MD-2 L146  |
|           |            | MD-2 L149  | MD-2 F147  |
|           |            | MD-2 F151  | MD-2 L149  |
|           |            | MD-2 I153  | MD-2 F151  |
|           |            |            | MD-2 I153  |

**Table S3: L<sub>6</sub> binding mode to TLR4-MD-2**

TLR4 R264 is a hydrogen bond donor to the carbonyl group of the acyl chain linked to N3. L6 is the only lipidoid making a hydrophilic contact at the primary TLR4 site as well as at the dimer interface. Hydrophobic interactions are more extensive the bigger the lipidoid, but otherwise overlapping.

| 3.5 Å      | 4.0 Å      | 4.5 Å      | 5.0 Å      |
|------------|------------|------------|------------|
| TLR4 R264  | TLR4 R264  | TLR4 R264  | TLR4 R264  |
| TLR4' E439 | TLR4' E439 | TLR4' E439 | TLR4' Q436 |
| TLR4' F440 | TLR4' F440 | TLR4' F440 | TLR4' E439 |
|            |            |            | TLR4' F440 |
|            |            |            | TLR4' S441 |
| MD-2 I32   | MD-2 V24   | MD-2 V24   | MD-2 V24   |
| MD-2 I46   | MD-2 I32   | MD-2 I32   | MD-2 I32   |
| MD-2 V48   | MD-2 I44   | MD-2 I44   | MD-2 I44   |
| MD-2 L61   | MD-2 I46   | MD-2 I46   | MD-2 I46   |
| MD-2 F76   | MD-2 V48   | MD-2 V48   | MD-2 V48   |
| MD-2 R90   | MD-2 I52   | MD-2 I52   | MD-2 I52   |
| MD-2 E92   | MD-2 L54   | MD-2 L54   | MD-2 L54   |
| MD-2 I94   | MD-2 L61   | MD-2 L61   | MD-2 L61   |
| MD-2 Y102  | MD-2 I63   | MD-2 I63   | MD-2 I63   |
| MD-2 I117  | MD-2 Y65   | MD-2 Y65   | MD-2 Y65   |
| MD-2 F119  | MD-2 L71   | MD-2 L71   | MD-2 L71   |
| MD-2 S120  | MD-2 L74   | MD-2 L74   | MD-2 L74   |
| MD-2 F121  | MD-2 F76   | MD-2 F76   | MD-2 F76   |
| MD-2 K122  | MD-2 L78   | MD-2 L78   | MD-2 L78   |
| MD-2 I124  | MD-2 I80   | MD-2 I80   | MD-2 I80   |
| MD-2 F126  | MD-2 L87   | MD-2 L87   | MD-2 L87   |
|            | MD-2 R90   | MD-2 R90   | MD-2 R90   |
|            | MD-2 E92   | MD-2 E92   | MD-2 E92   |
|            | MD-2 I94   | MD-2 I94   | MD-2 V93   |
|            | MD-2 Y102  | MD-2 Y102  | MD-2 I94   |
|            | MD-2 F104  | MD-2 F104  | MD-2 Y102  |
|            | MD-2 V113  | MD-2 V113  | MD-2 F104  |
|            | MD-2 T115  | MD-2 T115  | MD-2 V113  |
|            | MD-2 I117  | MD-2 I117  | MD-2 T115  |
|            | MD-2 S118  | MD-2 S118  | MD-2 I117  |
|            | MD-2 F119  | MD-2 F119  | MD-2 S118  |
|            | MD-2 S120  | MD-2 S120  | MD-2 F119  |
|            | MD-2 F121  | MD-2 F121  | MD-2 S120  |
|            | MD-2 K122  | MD-2 K122  | MD-2 F121  |
|            | MD-2 G123  | MD-2 G123  | MD-2 K122  |
|            | MD-2 I124  | MD-2 I124  | MD-2 G123  |
|            | MD-2 F126  | MD-2 F126  | MD-2 I124  |
|            | MD-2 C133  | MD-2 C133  | MD-2 F126  |
|            | MD-2 V135  | MD-2 V135  | MD-2 C133  |
|            | MD-2 F147  | MD-2 F147  | MD-2 V135  |
|            | MD-2 L149  | MD-2 L149  | MD-2 L146  |
|            | MD-2 F151  | MD-2 F151  | MD-2 F147  |
|            | MD-2 I153  | MD-2 I153  | MD-2 L149  |
|            |            |            | MD-2 F151  |
|            |            |            | MD-2 I153  |

**Table S4: Physicochemical characteristics of dispersions prepared in HEPES buffer (5 mM, pH 7.4).** Results denote mean values  $\pm$  SD (n=3).

| Formulation                          | z-average (nm)      | PDI                  | Zeta potential (mV) | Entrapment efficiency (%) | siRNA loading ( $\mu$ g siRNA/mg NPs) |
|--------------------------------------|---------------------|----------------------|---------------------|---------------------------|---------------------------------------|
| L <sub>5</sub> SNALPs <sup>a</sup>   | 79.4 $\pm$ 1.2***   | 0.086 $\pm$ 0.020    | -15.4 $\pm$ 1.1***  | 95.3 $\pm$ 4.2***         | 128.7 $\pm$ 5.6***                    |
| L <sub>mix</sub> SNALPs <sup>a</sup> | 85.9 $\pm$ 5.5***   | 0.074 $\pm$ 0.038    | -10.0 $\pm$ 1.5***  | 81.9 $\pm$ 2.1*           | 110.6 $\pm$ 2.8***                    |
| L <sub>4</sub> LPNs <sup>b</sup>     | 204.3 $\pm$ 14.1    | 0.135 $\pm$ 0.024    | 26.8 $\pm$ 8.9      | 61.4 $\pm$ 2.8**          | 4.6 $\pm$ 0.2**                       |
| L <sub>5</sub> LPNs <sup>b</sup>     | 212.5 $\pm$ 11.5    | 0.121 $\pm$ 0.027    | 23.2 $\pm$ 5.1      | 72.5 $\pm$ 3.8            | 5.4 $\pm$ 0.3                         |
| L <sub>6</sub> LPNs <sup>b, d</sup>  | 286.7 $\pm$ 23.0*** | 0.375 $\pm$ 0.027*** | 3.6 $\pm$ 2.9**     | 75.5 $\pm$ 3.6            | 5.7 $\pm$ 0.3                         |
| L <sub>mix</sub> LPNs <sup>b</sup>   | 201.0 $\pm$ 8.5     | 0.129 $\pm$ 0.019    | 32.8 $\pm$ 5.7      | 52.5 $\pm$ 2.9***         | 3.9 $\pm$ 0.2***                      |
| DOTAP LPNs <sup>c</sup>              | 192.7 $\pm$ 16.4    | 0.110 $\pm$ 0.013    | 26.5 $\pm$ 4.1      | 28.3 $\pm$ 2.3***         | 2.1 $\pm$ 0.2***                      |

<sup>a</sup> Prepared at an siRNA:lipid weight ratio of 1:7.5. <sup>b</sup> Prepared at 15% (w/w) lipidoid content at an siRNA:lipidoid weight ratio of 1:20; <sup>c</sup> Prepared at 10% (w/w) lipid content an siRNA:lipid weight ratio of 1:10; <sup>d</sup> A bimodal particle size distribution was noted. Statistically significant differences from L<sub>5</sub>-modified LPNs are indicated: \* $p$  < 0.05, \*\* $p$  < 0.01 and \*\*\* $p$  < 0.001.

**Table S5: siRNA sequences and modification patterns.** Lower case letters represent deoxyribonucleotides, underlined capital letters represent 2'-O-methylribonucleotides, and p denotes a phosphate residue.

| Name        | Target GenBank | Sense sequence                   | Antisense sequence                         |
|-------------|----------------|----------------------------------|--------------------------------------------|
| siRNA-EGFP  | JQ064510.1     | 5'-pACCCUGAAGUUCAUCUGCACCACcg-3' | 5'-CGGUGGUGCAGAU <u>GAA</u> CUUCAGGGUCA-3' |
| Neg control |                | 5'-AUCGUACGUACCGUCGUAUtt-3'      | 5'-AUACGACGGUACGUACGAUtt-3'                |
